# Supplementary material
Source: bioRxiv or medRxiv preprint supplement (http://medrxiv.org/highwire/filestream/91293/field_highwire_adjunct_files/0/2020.07.27.20162354-1.pdf)
Supplement: Supplementary file [file 2020.07.27.20162354-1.pdf]

**Supplemental File**

**Supplemental Table 1: Co-morbidity definitions**

| <b>NCD group</b>            | <b>UK Biobank self-reported illnesses included</b>                                                                                                                                                                                                        |
|-----------------------------|-----------------------------------------------------------------------------------------------------------------------------------------------------------------------------------------------------------------------------------------------------------|
| Hypertension                | Hypertension<br>Essential hypertension                                                                                                                                                                                                                    |
| Chronic cardiac disease     | Angina<br>Cardiomyopathy<br>Heart attack/myocardial infarction<br>heart failure/pulmonary oedema<br>Hypertrophic cardiomyopathy<br>Coronary angioplasty (ptca) +/- stent<br>Coronary artery bypass grafts<br>Triple heart bypass                          |
| Chronic respiratory disease | Asthma<br>Bronchiectasis<br>Chronic obstructive airways disease/COPD<br>Emphysema<br>Emphysema/chronic bronchitis<br>Fibrosing alveolitis/unspecified alveolitis<br>Interstitial lung disease<br>Other chronic respiratory problems<br>Pulmonary fibrosis |
| Diabetes                    | Diabetes<br>Diabetic eye disease<br>Diabetic nephropathy<br>Diabetic neuropathy/ulcers<br>Type 1 diabetes<br>Type 2 diabetes                                                                                                                              |
| Cancer                      | Any cancer diagnosis during lifetime                                                                                                                                                                                                                      |
| Chronic liver disease       | Liver failure/cirrhosis<br>Non-infective hepatitis<br>Oesophageal varices<br>Primary biliary cirrhosis                                                                                                                                                    |
| Chronic kidney disease      | Diabetic nephropathy<br>Immunoglobulin A (IgA) nephropathy<br>Kidney nephropathy<br>Polycystic kidney<br>Renal failure not requiring dialysis<br>Renal failure requiring dialysis<br>Renal/kidney failure                                                 |
| Prior stroke/TIA            | Brain haemorrhage<br>Ischaemic stroke<br>Stroke<br>Subarachnoid haemorrhage                                                                                                                                                                               |

|                                                                                 |                                                                                                                                                                                                                                                                                                                                                       |
|---------------------------------------------------------------------------------|-------------------------------------------------------------------------------------------------------------------------------------------------------------------------------------------------------------------------------------------------------------------------------------------------------------------------------------------------------|
|                                                                                 | Transient ischaemic attack (TIA)                                                                                                                                                                                                                                                                                                                      |
| Other neurology disease                                                         | Cerebral palsy<br>Epilepsy<br>Motor neurone disease<br>Multiple sclerosis<br>Myasthenia gravis<br>Parkinson's disease                                                                                                                                                                                                                                 |
| Psychiatric disease                                                             | Depression<br>Mania/bipolar disorder/manic depression<br>Postnatal depression<br>Schizophrenia                                                                                                                                                                                                                                                        |
| Chronic inflammatory and autoimmune rheumatic disease (Rheumatological disease) | Ankylosing spondylitis<br>Dermatomyositis<br>Dermatopolymyositis<br>Giant cell/temporal arteritis<br>Myositis/myopathy<br>Polymyalgia rheumatica<br>Polymyositis<br>Psoriatic arthropathy<br>Rheumatoid arthritis<br>Sarcoidosis<br>Scleroderma/systemic sclerosis<br>Sjogren's syndrome/sicca syndrome<br>Systemic lupus erythematosus<br>Vasculitis |

Legend: All comorbidities are defined using self-reported illness at verbal nurse led interview (UK Biobank data fields 20002 and 20004). COPD, chronic obstructive pulmonary disease.

## Supplemental Table 2: ICD-10 infection-death codes

A00.0, A00.1, A00.9, A01.0-A01.4, A02.0-A02.2, A02.8, A02.9, A03.0-A03.3, A03.8, A03.9, A04.0-A04.9, A06.2, A06.4-A06.6, A07.0, A07.8, A07.9, A08.0-A08.4, A09.9, A15.0-A15.9, A16.0-A16.9, A17.0, A17.1, A17.8, A17.9, A18.0-A18.8, A19.0-A19.2, A19.8, A19.9, A20.0-A20.3, A20.7-A20.9, A21.0-A21.3, A21.7-A21.9, A22.0-A22.2, A22.7-A22.9, A23.0-A23.3, A23.8, A23.9, A24.0-A24.4, A25.0, A25.9, A26.7-A26.9, A27.0, A27.8, A27.9, A28.8, A28.9, A30.0-A30.5, A30.8, A30.9, A31.0, A31.1, A31.8, A31.9, A32.0, A32.1, A32.7-A32.9, A33.X, A34.X, A35.X, A36.0-A36.3, A36.8, A36.9, A37.0, A37.1, A37.8, A37.9, A39.0, A39.2-A39.5, A39.8, A39.9, A40.0-A40.3, A40.8, A40.9, A41.0, A41.0-A41.5, A41.8, A41.9, A42.0-A42.2, A42.7-A42.9, A46.X, A48.0, A48.8, A49.0-A49.3, A49.2, A49.8, A49.9, A54.0, A54.2-A54.4, A54.5, A54.6, A54.8, A54.9, A56.4, A57.X, A66.0-A66.4, A66.6-A66.9, A67.0-A67.3, A67.9, A68.0, A68.1, A68.9, A69.1, A70.X, A71.0, A71.1, A71.9, A74.0, A74.8, A74.9, A75.0-A75.3, A75.9, A77.0, A79.0, A79.8, A79.9, A80.9, A81.0, A81.8, A81.9, A82.0, A82.1, A82.9, A83.0, A83.6, A83.8, A83.9, A84.0, A84.8, A84.9, A85.0-A85.2, A85.8, A86.X, A87.0, A87.1, A87.2, A87.8, A87.9, A88.0, A88.8, A89.X, A90.X, A91.X, A92.0, A92.3, A92.8, A92.9, A93.0, A93.8, A94.X, A95.0, A95.1, A95.9, A96.0, A96.8, A96.9, A98.0, A98.3, A98.4, A98.8, A99.X, B00.0, B00.1, B00.2, B00.3-B00.5, B00.7-B00.9, B01.0, B01.1, B01.2, B01.8, B01.9, B02.0, B02.1, B02.2, B02.3, B02.7-B02.9, B03.X, B05.0, B05.1, B05.2, B05.3, B05.4, B05.8, B05.9, B06.0, B06.8, B06.9, B07.X, B08.0, B08.4, B08.5, B08.8, B09.X, B16.0-B16.2, B16.9, B17.0, B17.1, B17.8, B17.9, B18.0-B18.2, B18.8, B18.9, B19.0, B19.9, B25.0, B25.1, B25.2, B25.8, B25.9, B26.0, B26.1, B26.2, B26.3, B26.8, B26.9, B27.0, B27.1, B27.8, B27.9, B30.0-B30.2, B30.3, B30.8, B30.9, B33.0, B33.2-B33.4, B33.8, B34.0-B34.4 (exclude corona), B34.8, B34.9, B35.9, B36.8, B37.0-B37.9, B38.0-B38.4, B38.7-B38.9, B41.0, B41.7-B41.9, B43.1, B43.2, B44.0-B44.2, B44.7-B44.9, B45.0-B45.3, B45.7-B45.9, B46.8, B47.1, B48.7, B48.8, B50.0, B50.8, B50.9, B51.0, B51.8, B51.9, B52.0, B52.8, B52.9, B53.0, B53.1, B53.8, B54.X, B55.0-B55.2, B55.9, B56.0, B56.1, B56.9, B58.0-B58.3, B58.8, B58.9, B60.0, B60.8, B64.X, B65.0-B65.2, B65.8, B65.9, B67.8, B67.9, B71.0, B71.8, B71.9, B76.1, B81.0, B81.4, B81.8, B82.0, B82.9, B83.0, B83.8, B83.9, B85.0-B85.2, B85.4, B87.0-B87.4, B87.8, B87.9, B88.0, B89.X, B91.X, B92.X, B94.0, B94.0, B94.1, B94.2, B94.8, B94.9, B95.0-B95.8, B96.0-B96.2, B96.3, B96.4, B96.5, B96.7, B96.8, B97.0-B97.8, D47.5, D73.3, E32.1, G00.0-G00.3, G00.8, G00.9, G01.X, G02.0, G02.1, G02.8, G03.0-G03.2, G03.8, G03.9, G04.2, G05.0, G05.1, G05.2, G06.0-G06.2, G07X, G14.X, G53.0, G53.1, G63.0, G73.1, G73.4, G93.3, G94.0, H03.0, H06.1, H10.0, H10.2, H10.3, H10.4, H10.5, H10.8, H10.9, H13.0, H13.1, H13.2, H16.1, H16.2, H19.1, H19.2, H19.3, H22.0, H32.0, H60.0, H60.1, H60.2, H60.3, H60.5, H60.8, H60.9, H62.0, H62.1, H62.3, H62.4, H65.0, H65.1, H65.2-H65.4, H65.9, H66.0-H66.4, H66.9, H67.0, H67.1, H67.8, H70.0, H70.1, H70.8, H70.9, H73.0, H73.1, H75.0, H94.0, I32.0, I32.1, I41.0, I41.1, I41.2, I42.3, I43.0, I52.0, I52.1, I68.1, I98.1, J00.X, J01.0-J01.4, J01.8, J01.9, J02.0, J02.8, J02.9, J03.0, J03.0, J03.8, J03.9, J06.0, J06.8, J06.9, J09.X, J10.0, J10.0, J10.1, J10.8, J11.0, J11.1, J11.8, J12.0, J12.1, J12.2, J12.3, J12.8, J12.9, J13X, J14X, J15.0- J15.9, J16.0, J16.8, J17.0, J17.1, J17.2, J17.3, J17.8, J18.0-J18.2, J18.8, J18.9, J20.0, J20.1, J20.2, J20.3, J20.4, J20.5-J20.7, J21.0, J21.1, J22.X, J31.0-J31.2, J32.0-J32.4, J32.8, J32.9, J34.0, J35.0, J36X, J39.0, J39.1, J44.0, J65X, J85.0, J85.1, J85.2, J85.3, K04.6, K04.7, K11.3, K12.2, K23.0, K35.2, K35.3, K35.8, K36.X, K37.X, K51.5, K52. 3, K57.0, K57.1, K57.2, K57.3, K57.4, K57.5, K57.8, K57.9, K61.0-K61.4, K63.0, K65.0, K65.8, K65.9, K67.0-K67.3, K75.0, K77.0, K80.0-K80.5, K81.0, K81.1, K81.9, K83.0, K93.0, L00.X, L02.0-L02.4, L02.8, L02.9, L03.0-L03.3, L03.8, L03.9, L05.0, L05.9, L92.2, L98.3, M00.0-M00.2, M00.8, M01, M01.0, M01.1,

M01.3, M01.4, M01.5, M01.6, M02.3, M03.0, M03.1, M35.4, M46.2, M49.0-M49.2, M49.3, M63.0, M63.1, M65.0, M68.0, M71.0, M73.0, M86.0-M86.2, M86.3-M86.6, M86.8, M86.9, M89.6, N08.0, N15.1, N16.0, N22.0, N29.1, N33.0, N34.0, N35.1, N39.0, N41.2, N45.0, N45.9, N73.0, N73.1, N73.2, N73.3, N73.4, N73.5, N74.0, N74.1, N75.1, N76.4, N77.0, N77.1, O26.4, O35.3, O75.3, O98.0, O98.4, O98.5, O98.6, O98.8, O989, P36.0-P36.5, P36.8, P36.9, P37.2, P78.1, R57.2, R76.1

Legend: ICD-10 codes adapted from Wu J *et al* (Incidence of infections associated with oral glucocorticoid dose in people diagnosed with polymyalgia rheumatica or giant cell arteritis: a cohort study in England. *CMAJ*; 2019; 191(25): E680-E688) with additional inclusion of codes I33, I38, I39 (for infective endocarditis) and removal of code symptoms (R05, R07.0)

### Supplemental Table 3: Classification of infection deaths

| <b>Infection classification</b>        | <b>Number (%)</b> |
|----------------------------------------|-------------------|
| Blood stream                           | 81 (5.9%)         |
| Bone, joint and connective tissue      | 5 (0.4%)          |
| Digestive tract, including liver       | 196 (14.2%)       |
| Genitourinary                          | 82 (5.9%)         |
| Heart and circulation                  | 61 (4.4%)         |
| Lower respiratory tract                | 840 (60.7%)       |
| Neurological and eye                   | 59 (4.3%)         |
| Other infections                       | 38 (2.7%)         |
| Skin and soft tissue                   | 20 (1.4%)         |
| Upper respiratory tract, including ENT | 3 (0.2%)          |

Legend: Data illustrated Figure 1b. ENT denotes ear, nose and throat.

**Supplemental Table 4: Multivariate competing risks regression analysis of the association between participant characteristics and risk of infection or non-infection death.**

|                       | Infection death |              |         | Non-infection death |             |         |
|-----------------------|-----------------|--------------|---------|---------------------|-------------|---------|
|                       | HR              | 95% CI       | p value | HR                  | 95% CI      | p value |
| <b>Age (in years)</b> |                 |              |         |                     |             |         |
| <45                   | 1.0 (ref)       |              |         | 1.0 (ref)           |             |         |
| 45 to <50             | 1.36            | (0.81-2.27)  | 0.243   | 1.57                | (1.42-1.73) | <0.001  |
| 50 to <55             | 2.90            | (1.85-4.57)  | <0.001  | 2.36                | (2.16-2.59) | <0.001  |
| 55 to <60             | 4.48            | (2.9-6.92)   | <0.001  | 3.45                | (3.16-3.76) | <0.001  |
| 60 to <65             | 6.53            | (4.28-9.98)  | <0.001  | 5.14                | (4.73-5.59) | <0.001  |
| 65+                   | 13.05           | (8.56-19.88) | <0.001  | 8.26                | (7.6-8.98)  | <0.001  |
| <b>Sex</b>            |                 |              |         |                     |             |         |
| Female                | 1.0 (ref)       |              |         | 1.0 (ref)           |             |         |
| Male                  | 1.55            | (1.39-1.74)  | <0.001  | 1.62                | (1.58-1.66) | <0.001  |
| <b>Ethnicity</b>      |                 |              |         |                     |             |         |
| White                 | 1.0 (ref)       |              |         | 1.0 (ref)           |             |         |
| Mixed                 | 0.59            | (0.22-1.57)  | 0.287   | 0.88                | (0.73-1.07) | 0.193   |
| Asian                 | 0.79            | (0.5-1.25)   | 0.320   | 0.80                | (0.71-0.89) | <0.001  |
| Black                 | 0.68            | (0.38-1.21)  | 0.188   | 0.79                | (0.69-0.89) | <0.001  |
| Chinese               | 0.48            | (0.07-3.4)   | 0.462   | 0.79                | (0.58-1.1)  | 0.163   |
| Other                 | 0.49            | (0.2-1.18)   | 0.113   | 0.88                | (0.75-1.03) | 0.102   |
| <b>SED quintile</b>   |                 |              |         |                     |             |         |
| 1                     | 1.0 (ref)       |              |         | 1.0 (ref)           |             |         |
| 2                     | 1.18            | (0.96-1.44)  | 0.117   | 1.00                | (0.96-1.04) | 0.99    |
| 3                     | 1.33            | (1.09-1.62)  | 0.005   | 1.06                | (1.02-1.11) | 0.003   |
| 4                     | 1.60            | (1.32-1.93)  | <0.001  | 1.15                | (1.1-1.19)  | <0.001  |
| 5                     | 2.10            | (1.75-2.51)  | <0.001  | 1.39                | (1.33-1.44) | <0.001  |
| <b>Smoking</b>        |                 |              |         |                     |             |         |
| Never                 | 1.0 (ref)       |              |         | 1.0 (ref)           |             |         |
| Former                | 1.37            | (1.21-1.56)  | <0.001  | 1.28                | (1.24-1.31) | <0.001  |
| Current               | 3.44            | (2.98-3.98)  | <0.001  | 2.51                | (2.42-2.6)  | <0.001  |
| <b>Obesity</b>        |                 |              |         |                     |             |         |
| Not obese             | 1.0 (ref)       |              |         | 1.0 (ref)           |             |         |
| Class 1               | 0.95            | (0.83-1.09)  | 0.479   | 1.06                | (1.02-1.09) | 0.001   |
| Class 2               | 1.03            | (0.83-1.28)  | 0.759   | 1.22                | (1.16-1.28) | <0.001  |
| Class 3               | 2.14            | (1.68-2.73)  | <0.001  | 1.53                | (1.42-1.64) | <0.001  |
| <b>Hypertension</b>   | 1.37            | (1.22-1.53)  | <0.001  | 1.16                | (1.13-1.19) | <0.001  |

|                                    |      |             |        |      |             |        |
|------------------------------------|------|-------------|--------|------|-------------|--------|
| <b>Chronic cardiac disease</b>     | 1.61 | (1.39-1.86) | <0.001 | 1.56 | (1.51-1.62) | <0.001 |
| <b>Chronic respiratory disease</b> | 2.17 | (1.92-2.44) | <0.001 | 1.28 | (1.24-1.32) | <0.001 |
| <b>Diabetes</b>                    | 1.72 | (1.47-2.01) | <0.001 | 1.63 | (1.56-1.69) | <0.001 |
| <b>Cancer</b>                      | 1.25 | (1.06-1.46) | 0.006  | 2.28 | (2.21-2.35) | <0.001 |
| <b>Chronic liver disease</b>       | 3.10 | (1.75-5.48) | <0.001 | 2.37 | (2.02-2.79) | <0.001 |
| <b>Chronic kidney disease</b>      | 4.58 | (3.16-6.64) | <0.001 | 2.54 | (2.24-2.88) | <0.001 |
| <b>Prior stroke/TIA</b>            | 1.77 | (1.44-2.18) | <0.001 | 1.53 | (1.44-1.62) | <0.001 |
| <b>Other neurology disease</b>     | 2.69 | (2.06-3.52) | <0.001 | 2.15 | (2-2.31)    | <0.001 |
| <b>Psychiatric disorder</b>        | 1.52 | (1.28-1.82) | <0.001 | 1.23 | (1.17-1.29) | <0.001 |
| <b>Rheumatological disease</b>     | 2.39 | (1.94-2.95) | <0.001 | 1.41 | (1.32-1.5)  | <0.001 |

Legend: All characteristics listed are included in the multivariate model. Data are illustrated in Figure 2. HR – hazard ratio, CI – confidence interval, ref – reference group, SED – socio-economic deprivation, BMI – body mass index, TIA – transient ischaemic attack.

**Supplemental Table 5: Multivariate competing risks regression analysis of the association between multimorbidity and risk of infection or non-infection death.**

| Number of Comorbidities | Infection Death |              |        | Non-infection death |             |        |
|-------------------------|-----------------|--------------|--------|---------------------|-------------|--------|
|                         | HR              | 95% CI       | p      | HR                  | 95% CI      | p      |
| <b>0</b>                | 1.0 (ref)       |              |        | 1.0 (ref)           |             |        |
| <b>1</b>                | 1.71            | (1.44-2.01)  | <0.001 | 1.47                | (1.43-1.52) | <0.001 |
| <b>2</b>                | 3.01            | (2.55-3.56)  | <0.001 | 2.01                | (1.94-2.08) | <0.001 |
| <b>3</b>                | 4.64            | (3.86-5.58)  | <0.001 | 2.69                | (2.58-2.81) | <0.001 |
| <b>4</b>                | 6.86            | (5.49-8.59)  | <0.001 | 3.87                | (3.65-4.09) | <0.001 |
| <b>5+</b>               | 9.03            | (6.61-12.34) | <0.001 | 5.68                | (5.22-6.17) | <0.001 |

Legend: The multivariate model is corrected for age, sex, ethnicity and socio-economic deprivation. Data are illustrated in Figure 3. HR – hazard ratio, CI – confidence interval, ref – reference group.
